# Supplementary material
Source: PubMed Central journal article supplement (PMC8253540)
Supplement: mmc1.pdf [file mmc1.pdf]

# THE LANCET

## Respiratory Medicine

### Supplementary appendix 1

This appendix formed part of the original submission and has been peer reviewed. We post it as supplied by the authors.

Supplement to: Estenssoro E, Loudet CI, Ríos FG, et al. Clinical characteristics and outcomes of invasively ventilated patients with COVID-19 in Argentina (SATICOVID): a prospective, multicentre cohort study. *Lancet Respir Med* 2021; published online July 2. [http://dx.doi.org/10.1016/S2213-2600\(21\)00229-0](http://dx.doi.org/10.1016/S2213-2600(21)00229-0).

## Resumen

**Antecedentes.** Aunque la COVID-19 ha afectado intensamente a los países de bajos y medianos ingresos, la información detallada sobre pacientes admitidos a las Unidades de Cuidados Intensivos (UCI) es aun escasa. Nuestro objetivo fue examinar las características de la ventilación mecánica y la mortalidad en pacientes con COVID-19 que requirieron ventilación mecánica invasiva en Argentina, un país de ingresos intermedio-altos.

**Métodos.** En este estudio multicéntrico de cohorte prospectiva (SATICOVID) se incluyeron pacientes de 18 años o mayores con COVID-19 confirmada por RT-PCR, que fueron admitidos a 63 UCIs en Argentina y que requirieron ventilación mecánica invasiva. En el día 1 de ingreso a la UCI se registraron variables demográficas, clínicas, de laboratorio y de manejo general; y en los días 1, 3 y 7 se registraron variables de fisiología respiratoria y de ventilación mecánica. La variable de resultado principal fue la mortalidad intrahospitalaria. Todos los pacientes fueron evaluados hasta el alta o el fallecimiento, cualquiera de los cuales haya ocurrido primero. Las variables secundarias de resultado fueron la mortalidad intra UCI, la identificación de predictores independientes de mortalidad, la duración de la ventilación mecánica invasiva, y los patrones de cambio de las variables de fisiología respiratoria y ventilación mecánica. El estudio fue registrado en ClinicalTrials.gov, NCT04611269, y se encuentra completado.

**Hallazgos.** Entre el 20 de marzo y el 31 de octubre de 2020 se incluyeron 1909 pacientes con COVID-19 en ventilación mecánica invasiva, cuya mediana de edad fue de 62 años [IQR 52–70]. 1294 (68·8%) fueron hombres; hipertensión y obesidad fueron las comorbilidades más frecuentes, y 939 (49·2%) requirieron vasopresores. Se utilizó ampliamente la ventilación protectora pulmonar; y la duración mediana de la ventilación mecánica fue de 13 días (RIC 7–22). El volumen corriente utilizado fue de 6·1 mL/kg de peso corporal ideal (RIC 6·0–7·0) en el día 1 y aumentó significativamente hasta el día 7; la presión positiva de fin de espiración fue de 10 cm H<sub>2</sub>O (8–12) en el día 1, con una leve pero significativa disminución hacia el día 7. En el día 1, la relación entre la presión parcial de oxígeno arterial (PaO<sub>2</sub>) y la fracción inspirada de oxígeno (FiO<sub>2</sub>) fue de 160 (RIC 111–218), la complacencia del sistema respiratorio fue de 36 mL/cm H<sub>2</sub>O (29–44), la presión inspiratoria fue de 12 cm H<sub>2</sub>O (10–14), y la FiO<sub>2</sub> 0·60 (0·45–0·80). El síndrome de distress respiratorio ocurrió en 1672 (87·6%) pacientes; 1176 (61·6%) recibieron decúbito prono. La mortalidad intrahospitalaria fue de 57·7% (1101/1909 pacientes) y la mortalidad en la UCI fue de 57·0% (1088/1909 pacientes); 462 (43·8%) fallecieron por hipoxemia refractaria, frecuentemente coincidente con shock séptico (n=174). La regresión de Cox identificó a edad (hazard ratio [HR] 1·02 [95% CI 1·01–1·03]), score de Charlson (1·16 [1·11–1·23]), intubación endotraqueal efectuada afuera de la UCI (antes del ingreso a la UCI; 1·37 [1·10–1·71]), utilización de vasopresores en el día 1 (1·29 [1·07–1·55]), concentración plasmática de dímero-D (1·02 [1·01–1·03]), PaO<sub>2</sub>/FiO<sub>2</sub> en el día 1 (0·998 [0·997–0·999]), pH arterial en el día 1 (1·01 [1·00–1·01]), presión inspiratoria en el día 1 (1·05 [1·03–1·08]), injuria renal aguda (1·66 [1·36–2·03]), y al mes de admisión (1·10 [1·03–1·18]) como predictores independientes de mortalidad.

Interpretación. En los pacientes con COVID-19 que requirieron ventilación mecánica invasiva, la ventilación protectora pulmonar fue ampliamente utilizada; no obstante la mortalidad fue elevada. Los predictores de mortalidad en nuestro estudio fueron en general semejantes a los descriptos en pacientes en ventilación mecánica invasiva en estudios efectuados en países de altos ingresos. La sobrecarga sostenida sobre el personal de salud por la COVID-19 podría haber contribuido a la alta mortalidad en Argentina. Nuestros datos aportan a identificar aspectos de mejora en el manejo de pacientes con COVID-19 en países de medianos ingresos, y en otros lugares del mundo.
